1 **Whole genome sequencing identifies high-impact variants in well-known**  
2 **pharmacogenomic genes**

3 Jihoon Choi<sup>1,2</sup>, Kelan G. Tantisira<sup>3,4,\*</sup>, Qing Ling Duan<sup>1,2,\*</sup>

4 <sup>1</sup>Department of Biomedical and Molecular Sciences, Queen's University, Kingston, Ontario,  
5 Canada; <sup>2</sup>School of Computing, Queen's University, Kingston, Ontario, Canada; <sup>3</sup>Channing  
6 Division of Network Medicine, Brigham and Women's Hospital and Harvard Medical School,  
7 Boston, MA, USA; <sup>4</sup>Division of Pulmonary and Critical Care Medicine, Brigham and  
8 Women's Hospital and Harvard Medical School, Boston, MA, USA.

9 \*These authors contributed equally to this work.

10 Correspondence: QL Duan ([qingling.duan@queensu.ca](mailto:qingling.duan@queensu.ca))

11

12

13 **Abstract**

14 More than 1,100 genetic loci have been correlated with drug response outcomes but  
15 disproportionately few have been translated into clinical practice. One explanation for the  
16 low rate of clinical implementation is that the majority of associated variants may be in  
17 linkage disequilibrium (LD) with the causal variants, which are often elusive. This study aims  
18 to identify and characterize likely causal variants within well-established pharmacogenomic  
19 genes using next-generation sequencing data from the 1000 Genomes Project. We identified  
20 69,319 genetic variations within 160 pharmacogenomic genes, of which 8,207 variants are in  
21 strong LD ( $r^2 > 0.8$ ) with known pharmacogenomic variants. Of the latter, 8 are coding or  
22 structural variants predicted to have high-impact, with 19 additional missense variants that  
23 are predicted to have moderate-impact. In conclusion, we identified putatively functional  
24 variants within known pharmacogenomics loci that could account for the association signals  
25 and represent the missing causative variants underlying drug response phenotypes.

26

## 27 **Introduction**

28 The current paradigm of drug therapy follows a “trial-and-error” approach where patients are  
29 prescribed a drug at a standardized dose with the expectation that alternative therapies or  
30 doses will be given during a return clinical visit(s).<sup>1</sup> Not surprisingly, this is inefficient and  
31 potentially hazardous for patients who require urgent care or are susceptible to adverse events,  
32 which may result in prolonged suffering and fatalities.<sup>2</sup> A better understanding of the  
33 modulators of drug response will improve and hopefully replace our current trial-and-error  
34 approach of drug therapy with more precise methods that are based on scientific knowledge.<sup>3</sup>

35 To date, more than 1,100 genetic loci have been correlated with drug response  
36 phenotypes (The Pharmacogenomics Knowledgebase (PharmGKB): [www.pharmgkb.org](http://www.pharmgkb.org)) but  
37 only a small fraction of these genomic findings have been implemented into clinical practice.  
38 In 2009, PharmGKB partnered with the Pharmacogenomics Research Network (PGRN) to  
39 establish the Clinical Pharmacogenetics Implementation Consortium (CPIC)).<sup>4,5,6</sup> The goal of  
40 CPIC is to provide specific guidelines that instruct clinicians on how to use or interpret a  
41 patient’s genetic test results to determine the optimal drug and dosage to each patient. As of  
42 June 2017, there are 36 drug-gene pairs with CPIC guidelines published, although there are  
43 127 well-established pharmacogenomic genes identified as CPIC genes and 64 additional  
44 genes labeled as Very Important Pharmacogenes (VIP) by the PharmGKB curators, which  
45 totals to 160 unique genes.

46 An example of a CPIC guideline is one that instructs physicians on how to interpret  
47 genomic information from clinical assays to determine a therapeutic dosage for warfarin, a  
48 commonly used drug for the prevention of thrombosis.<sup>7</sup> Warfarin is known to have a narrow  
49 therapeutic index and wide effect variances among patients. For example, a conventional

50 dose of warfarin may not be an effective anticoagulant in some patients or induce adverse  
51 events (e.g. excessive bleeding) in others.<sup>8</sup> Thus, it is often difficult to achieve and maintain a  
52 targeted effect by administering conventional doses. Recent advancement in  
53 pharmacogenomics helped to facilitate genetic tests of two genes that can be used to predict a  
54 patients' sensitivity to the drug prior to administration. Specifically, the therapeutic dosage of  
55 warfarin may be calculated based on one's genotypes at these loci, which has resulted in a  
56 significant improvement in drug safety.<sup>8,9</sup>

57         Despite the successful translation of a small fraction of pharmacogenomics findings  
58 into clinical practice, the rate of clinical implementation has been slow.<sup>6</sup> One explanation is  
59 that the majority of pharmacogenomics loci are correlated with drug response but do not  
60 represent the actual, causal variants themselves.<sup>10,11,12</sup> We hypothesize that the majority of  
61 known pharmacogenomics loci are genetic markers that tag causal variants, which have yet to  
62 be identified and are likely to be in linkage disequilibrium (LD) with the associated markers.  
63 The use of associated variants instead of the causal variants in clinical tests is limiting in that  
64 it may not reliably predict drug response.<sup>13</sup>

65         The primary objective of this study is to identify potentially causal variants in well-  
66 established pharmacogenomics-associated genes, which may account for the reported  
67 association signals. Specifically, we used whole genome sequencing data from the 1000  
68 Genomes Project<sup>14,15</sup> to derive all genetic variations identified within the 160 unique CPIC  
69 and VIP pharmacogenomics genes. Next, we tested the LD with known pharmacogenomic  
70 variants, and determined the predicted function of these LD variants using annotation  
71 databases and clinical outcome databases. Our results include a catalog of potentially  
72 functional variants that are in LD with well-established pharmacogenomics variants and

73 could represent the causative mutations within these loci.

## 74 **Results**

### 75 **Selection of pharmacogenomics loci and annotation of variants**

76 We selected 127 CPIC genes and 64 VIP genes (total of 160 unique loci) from PharmGKB,  
77 which we deemed as “well-established” pharmacogenomics loci (**Supplemental data 1**).

78 Next, we identified 887,980 variants within these loci using next generation sequencing data  
79 from the 1000 Genomes Project Phase I, of which 69,319 were variants with minor allele  
80 frequencies > 1% (**Supplemental data 2**). Annotation analysis using SnpEff<sup>16</sup> (genetic  
81 variant annotation and effect prediction toolbox) revealed that 65,333 (94%) of these variants  
82 were single nucleotide polymorphisms (SNPs), 1,404 (2%) were insertions, and 2,582 (4%)  
83 were deletions. As shown in **Figure 1**, the majority of these occur within intronic regions  
84 (~75%), with the remainder located 3' or downstream (~11%), 5' or upstream (~9%), and  
85 exonic (~2%). Of the coding variants, approximately half of these variants are missense  
86 (~49%), or synonymous mutations (~50%) with some occurrences of nonsense (~1%)  
87 mutations. We compared our findings with annotation results of whole genome sequencing  
88 data of 1000 Genome Project phase I dataset (<http://snpeff.sourceforge.net/1kg.html>) and  
89 confirmed that the results of variant annotation within 160 PGx genes are within an expected  
90 range (**Supplemental figure 1**).

### 91 **Linkage disequilibrium analysis**

92 We assessed the LD between associated variants within known pharmacogenomics loci and  
93 variants identified in our study. Analysis of LD was done in each of the four populations  
94 (American, European, East Asian, African) from Phase I of 1000 Genomes Project. This

95 resulted in 8,207 novel variants forming 21,256 instances of LD ( $r^2 > 0.8$ ) with 859 known  
96 pharmacogenomics variants (**Supplemental data 3**).

### 97 **High-impact variations**

98 We identified 8 variants predicted to have a high-impact using SNPEff from the 1000 GP  
99 database that were in LD ( $r^2 > 0.8$ ) with 22 known pharmacogenomics variants. These  
100 included potentially functional variants that code for an alternative splice donor site,  
101 structural interaction, frameshift mutation, stop gain, or stop lost variation. **Table 1** lists these  
102 new LD variants along with the corresponding pharmacogenomics variants, the majority of  
103 which are predicted to be non-coding located within introns, up/downstream, and  
104 synonymous, with only few instances of missense and frameshift variants).

### 105 **Moderate-impact variations**

106 We identified 19 missense variants that are in LD with 32 pharmacogenomics variants, which  
107 are predicted to have a moderate, low, or modifying effects by SNPEff (**Table 2**). Among the  
108 newly identified variants, two are regulatory variants that could potentially affect protein  
109 binding, and one has been associated with neural tube defects and spina bifida cystica.

### 110 **Low-impact variations**

111 From the total of 8,207 variants in LD, 7,751 variants are classified by SNPEff as variants  
112 with unpredictable impact or “modifier” variants. These are in LD with 920 known  
113 pharmacogenomics variants with similar impact features. Of these, 324 modifier variants  
114 were potential regulatory variants affecting gene expression, protein binding, or transcription  
115 factor binding.

116 In this study, we will focus on modifier variants that are classified under category 1

117 of RegulomeDB database, which are known eQTLs or variants correlated with variable gene  
118 expression. Among 324 modifier variants with RegulomeDB scores, 84 variants were  
119 classified as category 1, forming 213 instances of LD with 73 pharmacogenomics variants  
120 which are predicted to have low or modifying effects (**Supplemental data 4**).

#### 121 **Variants associated with clinical outcomes**

122 Using SNPedia database, we discovered 46 variants in LD that are correlated with clinical  
123 phenotypes as documented in **Supplemental data 5**.

#### 124 **Discussion**

125 This manuscript reports the identification of potentially functional genetic variants within  
126 genes previously correlated with drug response outcomes. We show that some of the novel  
127 variants identified from next-generation sequencing (NGS) of whole genomes (Phase I of the  
128 1000 Genomes Project) are in LD with well-known pharmacogenomics variants and could  
129 account for the functional basis underlying the association signals. Many of these LD variants  
130 code for non-synonymous amino acid substitutions, frame-shift mutations, introduce a splice  
131 variant that results in alternative splicing of the transcript, or located in non-coding regions  
132 but are correlated with gene expression levels (expression quantitative trait loci or eQTL) or  
133 other clinical phenotypes.

134 In this study, we used LD analysis to determine the correlation between novel genetic  
135 variants identified from the 1000 Genomes Project database and known pharmacogenomics  
136 variants. We reasoned that any variant(s) in strong LD ( $r^2 > 0.8$ ) with the known  
137 pharmacogenomics loci could account for the association signal and have potential to be the  
138 actual causal variants at these genomic loci. In order to prioritize the identified variants, we

139 used a popular annotation toolbox (SNPEff) to predict the function of each variant. In  
140 addition, we used additional information such as RegulomeDB and SNPedia to prioritize the  
141 variant(s) of higher impact from those with low impact.

142 Many of the variants we identified are “novel” in that these have not been reported in  
143 earlier pharmacogenomics studies. For example, we identified a splice donor variant  
144 (rs28364311) located on a VIP gene *ADH1A*. This variant is in LD with a pharmacogenomics  
145 associated variant, rs6811453, which is associated with increased resistance to cytarabine,  
146 fludarabine, gemtuzumab ozogamicin and idarubicin in patients with acute myeloid  
147 leukemia.<sup>17</sup> The associated pharmacogenomics variant is non-coding and have no known  
148 biological function as it is located downstream (3') of the gene. Considering the potential  
149 impact of rs28364311 on splicing and its strong LD with the associated pharmacogenomics  
150 variant, it is plausible that the splice variant identified is the functional variant that accounts  
151 for the original association signals at this locus.

152 Moreover, we identified that a stop gain variant rs4330 from the VIP gene *ACE*,  
153 encoding the angiotensin-converting enzyme, is in LD with 6 known pharmacogenomics  
154 variants (rs4341, rs4344, rs4331, rs4359, rs4363, and rs4343). Whereas the latter are intronic  
155 or code for synonymous changes, which are less likely to have detrimental effects on the gene  
156 product, the identified rs4330 codes for a truncated protein that is likely to have detrimental  
157 effects.

158 Another example is a modifier variant (rs2854509), which we report to be in LD with  
159 a pharmacogenomics variant (rs3213239) that is associated with decreased overall survival  
160 and progression-free survival when treated with Platinum compounds in patients with non-  
161 small-cell lung carcinoma. Our identified variant rs2854509 is located at downstream,



162 whereas pharmacogenomics variant rs3213239 is located upstream of gene encoding X-Ray  
163 Repair Cross Complementing 1 protein (*XRCCI*). Our analysis revealed that variant  
164 rs2854509 is a cis-eQTL variant acting on CPIC gene *XRCCI*, which is associated with  
165 variable efficacy in in platinum-based chemotherapy agents. Additional findings from  
166 RegulomeDB showed a direct evidence of binding-site alteration through ChIP-seq and  
167 DNase with a matched position weight matrix to the ChIP-seq factor and a DNase footprint.  
168 These findings suggest the possibility that rs2854509 has regulatory effects on the gene  
169 *XRCCI*, which could modulate response to platinum based chemotherapy treatments.

170 Our proof of principle study demonstrates that many of the well-known  
171 pharmacogenomics loci from PharmGKB are genetic markers that may tag causal variants.  
172 Often the latter remain elusive and are likely to be in linkage disequilibrium (LD) with the  
173 associated markers. Using NGS data, we identified a number of sequence variants in LD with  
174 these pharmacogenomics loci with supporting functional evidence from current annotation  
175 softwares. These findings, pending experimental evidence, will ultimately facilitate the  
176 translation of improved clinical assays to predict response for a particular drug or dosage  
177 prior to administration. The implementation of these clinical tests promises to improve  
178 efficacy of drug therapy while reducing the incidence of adverse events.<sup>18</sup>

179 One limitation of the approach taken is the exclusion of rare variants (minor allele  
180 frequency < 0.01). While rare variants are more likely to be functional and clinically relevant,  
181 our decision to exclude them from this study was based on the limited sample size (approx.  
182 200-400 in each of the four main populations: American, European, East Asian, African) of  
183 1KGP Phase 1. Specifically, we would not be able to determine LD among rare variants  
184 (MAF < 0.01) in such small populations. Another limitation is that this study was based on

185 bioinformatics methods and we did not experimentally validate the potentially functional  
186 variants identified, nor confirm their correlation with drug response outcomes. Instead our  
187 study was proof of concept that associated variants in well-established pharmacogenomics  
188 genes could represent markers of drug response rather than the casual variants. Further  
189 studies are needed to identify and ultimately validate the often elusive functional variants in  
190 these loci. These additional studies include genotyping of these potentially functional variants  
191 (identified in LD with the associated variants) and testing them directly for correlation with  
192 drug response outcomes in clinical trials. Other experiments are needed to confirm the  
193 biological impact of these variants on the resultant RNA transcripts or proteins, which  
194 depends on the predicted impact of the variants identified. For example, variants of high  
195 impact (Table 1) include splicing effects, premature stop codons, and structural interactions,  
196 which could be validated through direct sequencing of transcripts and mass spectrometry to  
197 detect truncated and mis-folded proteins.

198         Our study identified novel genetic variations located in well-established  
199 pharmacogenomics genes, which could account for the association signals at these loci and  
200 have strong impact on the resulting gene products. We applied an innovative approach that  
201 combined bioinformatics resources such as PharmGKB, sequencing data from the 1000 GP,  
202 population annotation software such as SNPEff as well as databases such as RegulomeDB to  
203 identify novel variants and predict their functional effects within pharmacogenomics loci.  
204 Moreover, we determined that a number of these potentially functional variants are in LD  
205 with known pharmacogenomics variants and could account at least in part for the original  
206 association signals. Identification of these elusive causal variants could facilitate more  
207 accurate genetic tests to predict treatment response prior to drug administration. The

208 improved accuracy results from direct testing instead of relying on LD, which varies among  
209 populations (as noted by our study of LD across 4 populations in the 1000 GP). Thus,  
210 identification of causal variants will improve the translation of pharmacogenomics findings  
211 into clinical practice and ultimately replace the current trial and error approach for drug  
212 therapy, moving us closer towards precision medicine.

213

## 214 **Methods**

### 215 **Pharmacogenomic genes**

216 We selected 160 unique pharmacogenomics associated loci, containing 127 CPIC genes (June  
217 5<sup>th</sup>, 2017 release) and 64 VIP genes (May 1st, 2017 release) from the PharmGKB database.  
218 Then, we identified the genomic coordinates of each gene from the GRCh37/hg19 assembly  
219 of the human reference genome using the University of Santa Cruz (UCSC) Genome  
220 Browser.<sup>19</sup> Next, genomic coordinates were padded with 5000 bp both 5' and 3' of each gene  
221 to include potential regulatory regions. All variants that appear in at least 1% of the 1000  
222 Genomes Project Phase I population (Feb. 2009 release) were extracted.

### 223 **Functional annotations**

224 After reviewing many annotation tools (including annoVar, VEP, Polyphen/SIFT, CADD), we  
225 decided that SnpEff best meets our needs as it allows a great degree of compatibility with  
226 various input formats, offers high flexibility in search settings, can annotate a full exome set  
227 in seconds, based on up-to-date transcript and protein databases, and has the ability to be  
228 integrated with other tools. SnPEff (version 4.2, build 2015-12-05) was used with the  
229 GRCh37.75 assembly to predict the effects of identified variants. For variants with multiple  
230 annotations (e.g. variant affects multiple genes or have varying effects depending on the  
231 transcript), only the most severe consequence was selected and used to represent each variant  
232 in tables to ease the comparison of impacts among variants. To standardize terminology used  
233 for assessing sequence changes, SNPEff uses sequence ontology  
234 (<http://www.sequenceontology.org/>) definitions to describe functional annotations.

### 235 **Linkage disequilibrium analysis**

236 Linkage disequilibrium (LD) between the well-established pharmacogenomics variants  
237 (1,151 variants annotated by PharmGKB retrieved on June 16<sup>th</sup>, 2017, that are found within  
238 160 PGx loci and 1000 Genomes project phase 1 dataset) and identified variants from the  
239 1000 Genomes Project phase 1 dataset using Plink (version 1.09).<sup>20</sup> Distance window for the  
240 LD analysis were set to 1Mb and an  $r^2$  threshold of  $> 0.8$ .

#### 241 **SNPs associated with regulation and phenotypes**

242 For each variant identified to be in LD with an established pharmacogenomic variant, we  
243 used RegulomeDB<sup>21</sup> to evaluate and score those that have the potential to cause regulatory  
244 changes, such as eQTL, regions of DNAase hypersensitivity, binding sites of transcription  
245 factors and proteins. RegulomeDB uses GEO<sup>22</sup>, the ENCODE<sup>23</sup> project, and various  
246 published literatures to assess these information. In addition to that, we used SNPedia<sup>24</sup>, a  
247 database of over 90,000 SNPs and associated peer-reviewed scientific publications, to  
248 identify variants that are previously associated with phenotypes. (**Figure 2**)

249

250

251 **Acknowledgements**

252 We would like to thank Dr. Alan R. Shuldiner and support from the Translational  
253 Pharmacogenomics Project. This manuscript was supported by NIH grants U01 HL65899,  
254 U01 HL105198 and K99 HL116651. Computations were performed on resources and with  
255 support provided by the Centre for Advanced Computing (CAC) at Queen's University in  
256 Kingston, Ontario. The CAC is funded by: the Canada Foundation for Innovation, the  
257 Government of Ontario, and Queen's University. QLD receives funding from the Canadian  
258 Institutes of Health Research and Queen's University.

259 **Conflict of interest**

260 The authors declare no conflicts of interest.

261 **Author contribution**

262 All authors contributed to the writing of the manuscript. J.C. performed the data analyses and  
263 drafted the manuscript. Q.L.D. supervised data analyses and assisted in the writing of the  
264 manuscript. Q.L.D. and K.G.T. designed the research project.

265 **Code Availability**

266 Code and data used in this manuscript can be accessed from a public repository  
267 <https://github.com/12jc59/DuanlabPharmacogenomicsProject>.

## References

- 1 Evans WE, Relling M V. Moving towards individualized medicine with pharmacogenomics. *Nature* 2004; **429**: 464–468.
- 2 Giacomini KM, Yee SW, Ratain MJ, Weinshilboum RM, Kamatani N, Nakamura Y. Pharmacogenomics and patient care: one size does not fit all. *Sci Transl Med* 2012; **4**: 153ps18-153ps18.
- 3 Evans WE, Relling M V. Pharmacogenomics: translating functional genomics into rational therapeutics. *Science (80- )* 1999; **286**: 487–491.
- 4 Hewett M, Oliver DE, Rubin DL, Easton KL, Stuart JM, Altman RB *et al.* PharmGKB: the pharmacogenetics knowledge base. *Nucleic Acids Res* 2002; **30**: 163–165.
- 5 Shuldiner AR, Relling M V, Peterson JF, Hicks K, Freimuth RR, Sadee W *et al.* The Pharmacogenomics Research Network Translational Pharmacogenetics Program: Overcoming Challenges of Real-World Implementation. *Clin Pharmacol Ther* 2013; **94**: 207–210.
- 6 Relling M V, Klein TE. CPIC: clinical pharmacogenetics implementation consortium of the pharmacogenomics research network. *Clin Pharmacol Ther* 2011; **89**: 464–467.
- 7 Johnson JA, Gong L, Whirl-Carrillo M, Gage BF, Scott SA, Stein CM *et al.* Clinical Pharmacogenetics Implementation Consortium Guidelines for CYP2C9 and VKORC1 genotypes and warfarin dosing. *Clin Pharmacol Ther* 2011; **90**: 625–629.
- 8 Jaffer A, Bragg L. Practical tips for warfarin dosing and monitoring. *Cleve Clin J Med* 2003; **70**: 361–371.
- 9 Takeuchi F, McGinnis R, Bourgeois S, Barnes C, Eriksson N, Soranzo N *et al.* A

- genome-wide association study confirms VKORC1, CYP2C9, and CYP4F2 as principal genetic determinants of warfarin dose. *PLoS Genet* 2009; **5**: e1000433.
- 10 Soranzo N, Cavalleri GL, Weale ME, Wood NW, Depondt C, Marguerie R *et al*. Identifying candidate causal variants responsible for altered activity of the ABCB1 multidrug resistance gene. *Genome Res* 2004; **14**: 1333–1344.
- 11 Wechsler ME, Israel E. How pharmacogenomics will play a role in the management of asthma. *Am J Respir Crit Care Med* 2005; **172**: 12–18.
- 12 Zhang W, Dolan ME. Impact of the 1000 genomes project on the next wave of pharmacogenomic discovery. *Pharmacogenomics* 2010; **11**: 249–256.
- 13 Van den Broeck T, Joniau S, Clinckemalie L, Helsen C, Prekovic S, Spans L *et al*. The role of single nucleotide polymorphisms in predicting prostate cancer risk and therapeutic decision making. *Biomed Res Int* 2014; **2014**.
- 14 Whirl-Carrillo M, McDonagh EM, Hebert JM, Gong L, Sangkuhl K, Thorn CF *et al*. Pharmacogenomics knowledge for personalized medicine. *Clin Pharmacol Ther* 2012; **92**: 414–417.
- 15 The 1000 Genomes Project Consortium. A global reference for human genetic variation. *Nature*. 2015; **526**: 68–74.
- 16 Cingolani P, Platts A, Wang le L, Coon M, Nguyen T, Wang L *et al*. A program for annotating and predicting the effects of single nucleotide polymorphisms, SnpEff: SNPs in the genome of *Drosophila melanogaster* strain w1118; iso-2; iso-3. *Fly* 2012; **6**: 80–92.
- 17 Iacobucci I, Lonetti A, Candoni A, Sazzini M, Papayannidis C, Formica S *et al*.



- Profiling of drug-metabolizing enzymes/transporters in CD33+ acute myeloid leukemia patients treated with Gemtuzumab-Ozogamicin and Fludarabine, Cytarabine and Idarubicin. *Pharmacogenomics J* 2013; **13**: 335–341.
- 18 Mancinelli L, Cronin M, Sadée W. Pharmacogenomics: the promise of personalized medicine. *AAPS J* 2000; **2**: 29–41.
- 19 Karolchik D, Hinrichs AS, Furey TS, Roskin KM, Sugnet CW, Haussler D *et al.* The UCSC Table Browser data retrieval tool. *Nucleic Acids Res* 2004; **32**: D493-6.
- 20 Purcell S, Neale B, Todd-Brown K, Thomas L, Ferreira MAR, Bender D *et al.* PLINK: A tool set for whole-genome association and population-based linkage analyses. *Am J Hum Genet* 2007; **81**: 559–575.
- 21 Boyle AP, Hong EL, Hariharan M, Cheng Y, Schaub MA, Kasowski M *et al.* Annotation of functional variation in personal genomes using RegulomeDB. *Genome Res* 2012; **22**: 1790–1797.
- 22 Edgar R. Gene Expression Omnibus: NCBI gene expression and hybridization array data repository. *Nucleic Acids Res* 2002; **30**: 207–210.
- 23 Consortium EP, Dunham I, Kundaje A, Aldred SF, Collins PJ, Davis C a *et al.* An integrated encyclopedia of DNA elements in the human genome. *Nature* 2012; **489**: 57–74.
- 24 Cariaso M, Lennon G. SNPedia: a wiki supporting personal genome annotation, interpretation and analysis. *Nucleic Acids Res* 2012; **40**: D1308-12.

## **Figure Legends**

**Figure 1. Genomic regions of all variants identified from the 1000 Genomes Project database within 160 known pharmacogenomics genes.** Locations of all the single nucleotide variants identified within the 160 Pharmacogenomics loci using sequence data from the 1000 Genomes Project.

**Figure 2. Overview of the experimental design.** Flow of work outlined in methods section of the manuscript, which highlights the selection of 160 genes from the Pharmacogenomics Knowledge Database (PharmGKB), identification of variants from the 1000 Genome Project Data, and subsequent steps for annotation and test LD among variants.

**Supplemental Figure 1. Comparison of annotation findings between variants from 160 PGx genes and whole genome.** a) 94% of variants identified in 160 PGx genes were SNPs, 4% deletions, 2% insertions. These numbers are similar to the whole exome data from the 1000 GP. b) Annotation of coding regions within 160 PGx genes identified 49% missense, 50% silent, and 1% nonsense variations. Annotation results from the entire exome had a slightly higher rate of missense mutations and lower rate of silent mutations. However, the ratio of missense to silent mutations in the human exome is expected to be approx. 1.0. Thus, we concluded that our findings fall within the expected range. c) In both whole genome and the 160 PGx genes, the majority of variants fall within intronic regions. Whole genome annotations resulted in higher number of intergenic variants (~12%) compared 160 PGx genes (~1.5%). This is due to the fact that we had included limited (5000 bp) flanking regions in our targeted PGx genes in contrast to whole genome sequences. Other than intergenic regions, variants located 5', 3', exons, and splice sites occurred with similar frequencies in our candidate genes compared to the whole genome.

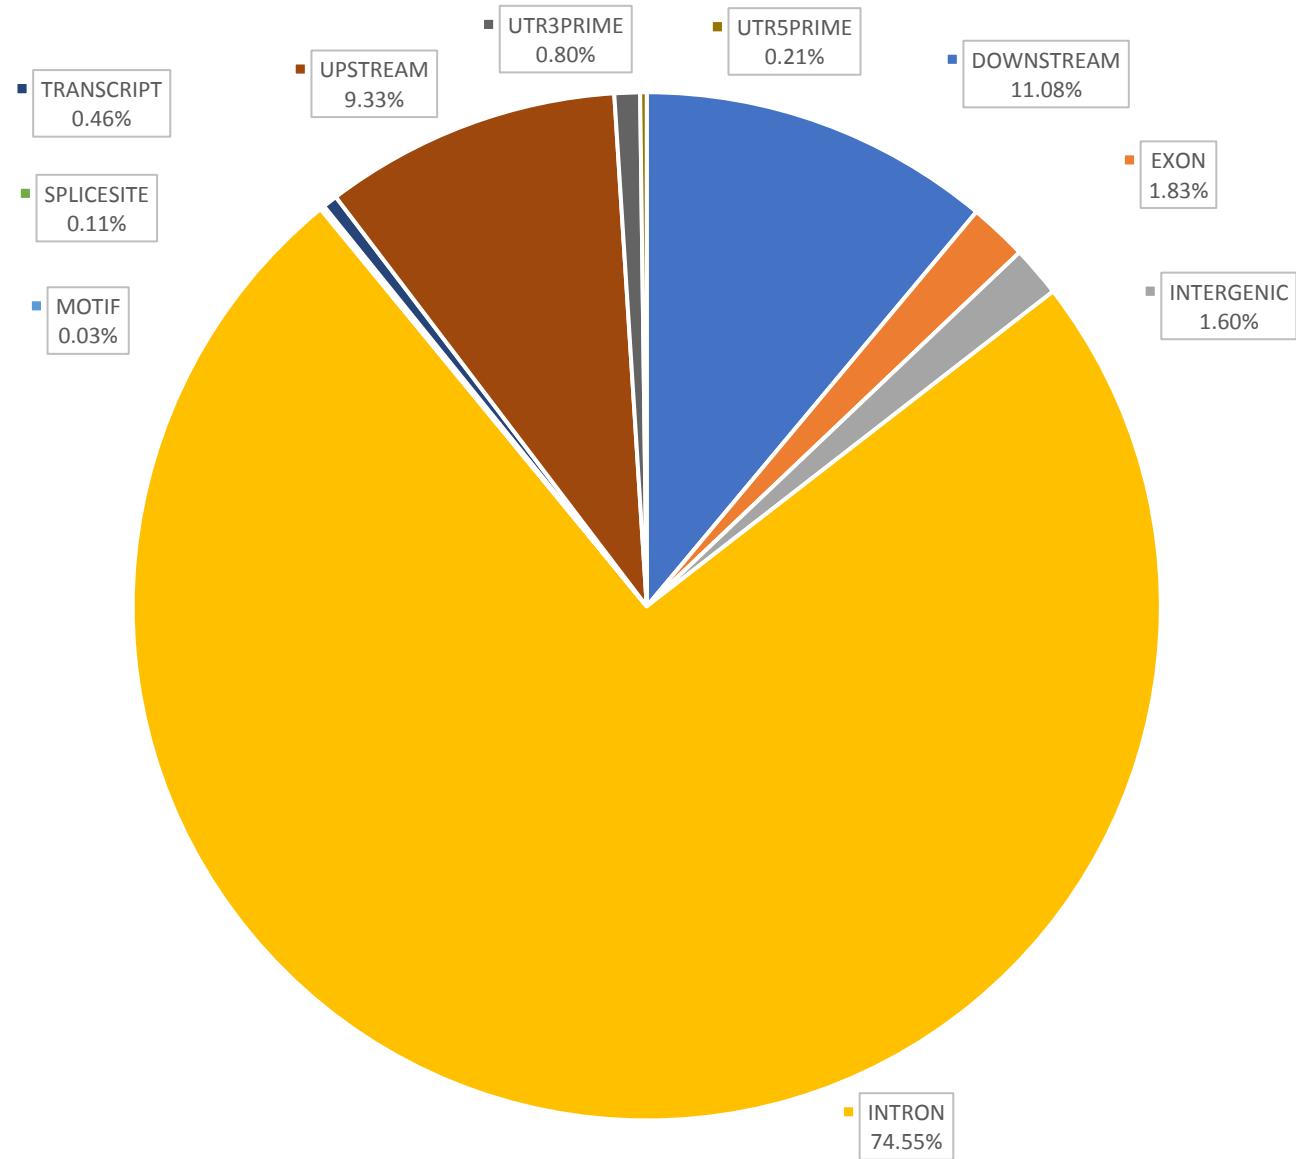

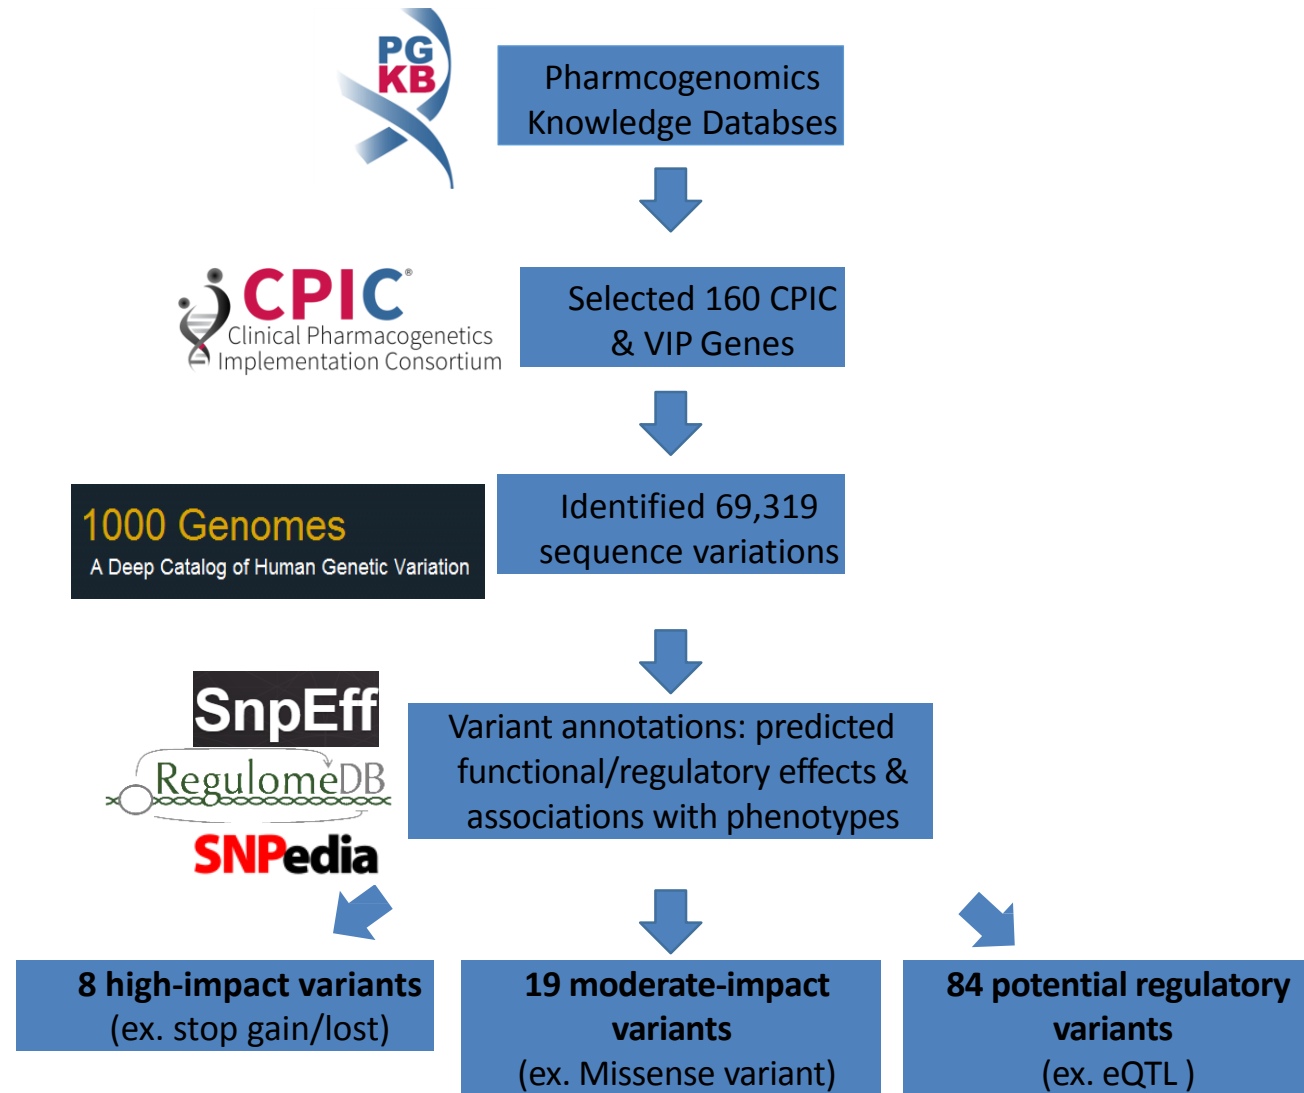

# Supplemental figure 1 – Comparison of annotation findings between variants from 160 pharmacogenomic genes and whole genome

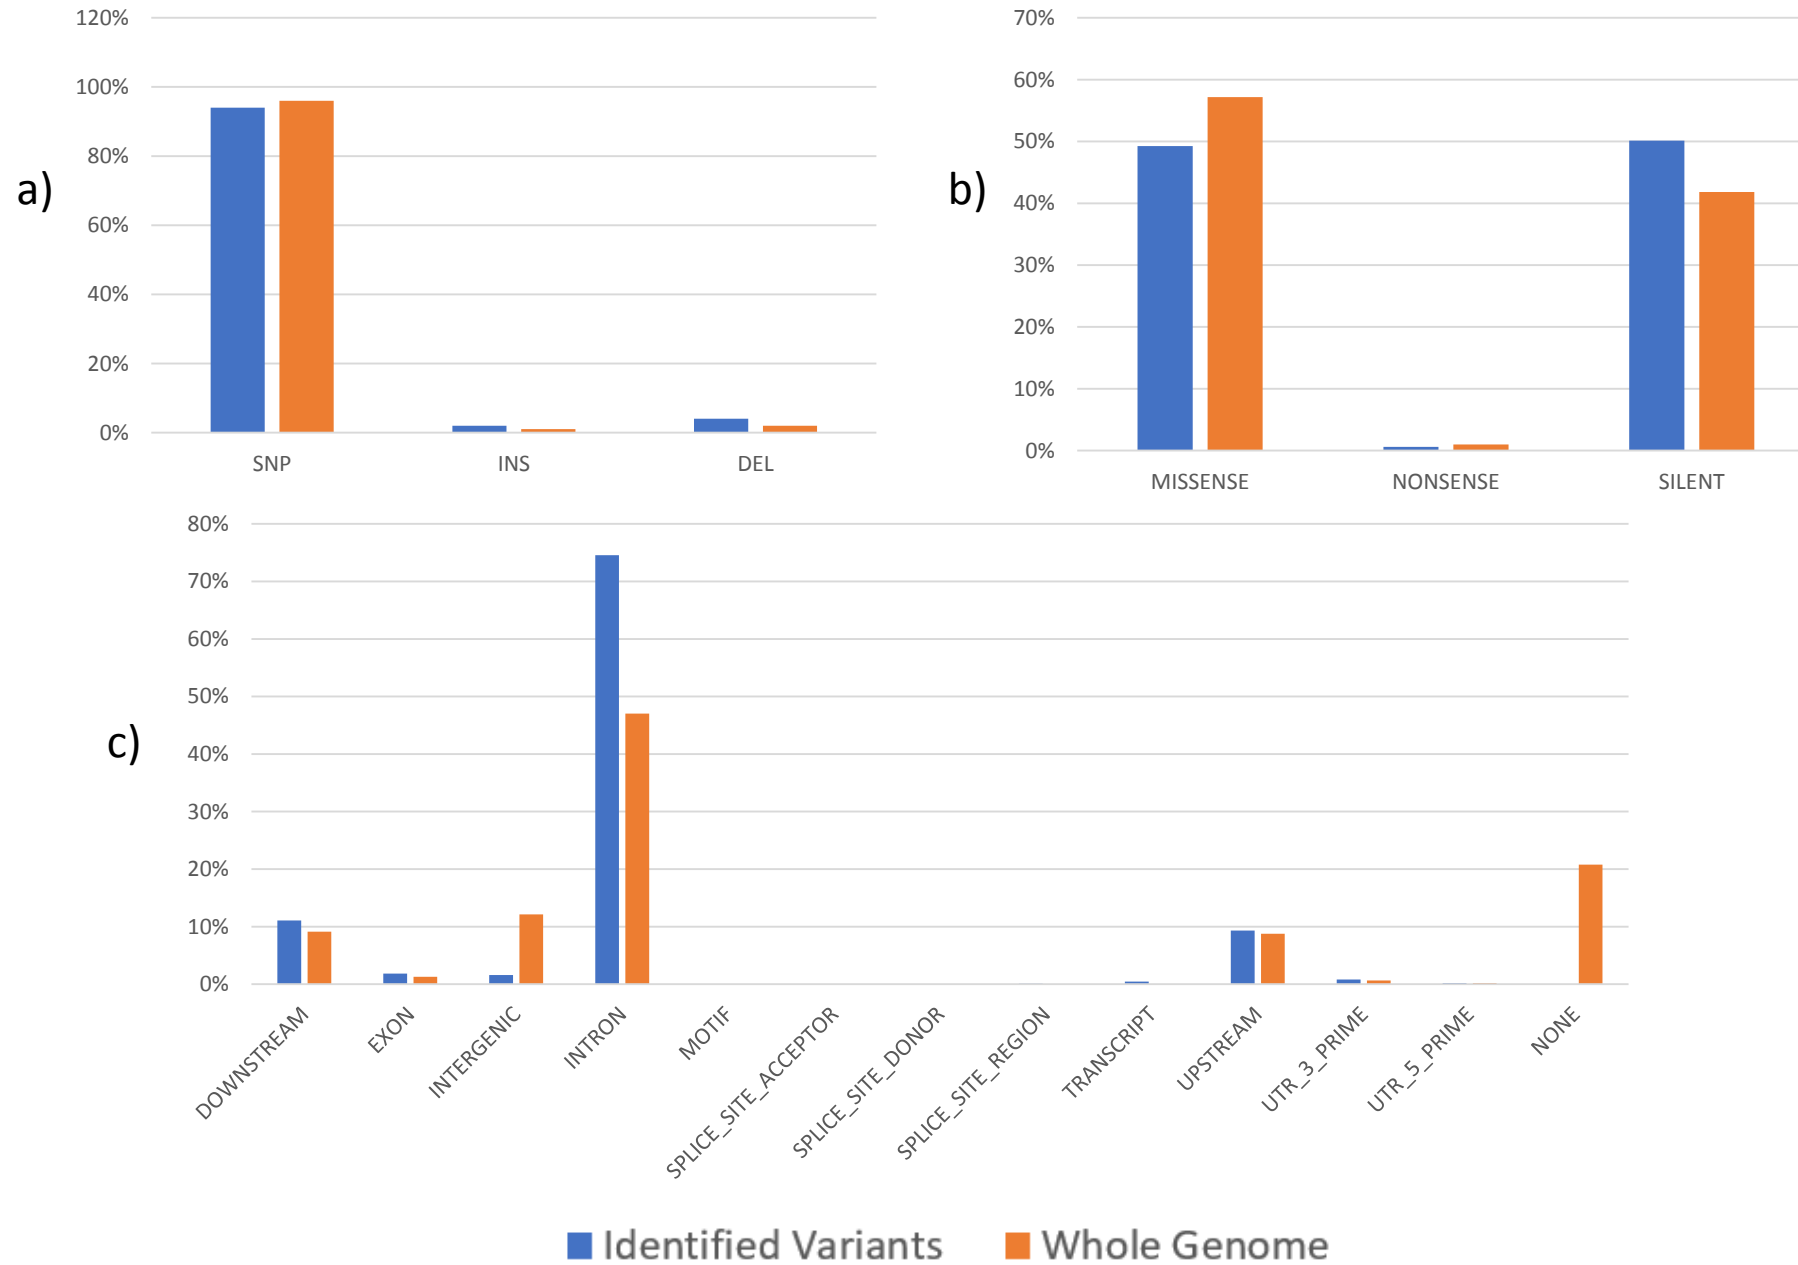

**Table 1 - Variants with high impact predictions, which are in LD with known pharmacogenomics variants.**

| Chr       | New Variant | Gene                  | Functional annotation                 | PharmGKB Variant | Gene    | Functional annotation                  | EUR r2 | EAS r2 | AMR r2 | AFR r2 |
|-----------|-------------|-----------------------|---------------------------------------|------------------|---------|----------------------------------------|--------|--------|--------|--------|
| 3         | rs13146     | UMPS                  | structural interaction variant        | rs1801019        | UMPS    | missense variant                       | 0.98   | 1.00   | 1.00   | 0.98   |
| 4         | rs28364311  | ADH1A                 | splice donor variant & intron variant | rs6811453        | ADH1A   | downstream gene variant                | 0.99   | 1.00   | 1.00   | 1.00   |
| 6         | rs677830    | OPRM1                 | stop gained                           | rs558025         | OPRM1   | downstream gene variant                | 1.00   | 1.00   | 0.98   | <0.8   |
| 7         | rs6977165   | CYP3A5                | stop lost                             | rs41303343       | CYP3A5  | frameshift variant                     | <0.8   | <0.8   | <0.8   | 0.80   |
| 17        | rs4330      | ACE                   | stop gained                           | rs4341           | ACE     | 3 prime UTR variant                    | 0.99   | 0.95   | 1.00   | 0.95   |
|           |             |                       |                                       | rs4343           | ACE     | synonymous variant                     | 0.95   | 0.95   | 0.87   | <0.8   |
|           |             |                       |                                       | rs4344           | ACE     | upstream gene variant                  | 0.99   | 0.96   | 1.00   | 0.90   |
|           |             |                       |                                       | rs4331           | ACE     | synonymous variant                     | 0.86   | <0.8   | 0.88   | 0.84   |
|           |             |                       |                                       | rs4359           | ACE     | intron variant                         | 0.96   | <0.8   | 0.91   | <0.8   |
|           |             |                       |                                       | rs4363           | ACE     | splice region variant & intron variant | 0.93   | <0.8   | 0.86   | <0.8   |
| 19        | rs11322783  | IFNL4                 | frameshift variant                    | rs12980275       | IFNL3P1 | upstream gene variant                  | <0.8   | 0.87   | 0.87   | <0.8   |
|           |             |                       |                                       | rs8105790        | IFNL3P1 | upstream gene variant                  | <0.8   | 0.94   | <0.8   | <0.8   |
|           |             |                       |                                       | rs4803217        | IFNL3   | downstream gene variant                | 0.83   | 0.97   | 0.87   | <0.8   |
|           |             |                       |                                       | rs11881222       | IFNL4   | downstream gene variant                | 0.87   | 0.94   | 0.84   | <0.8   |
|           |             |                       |                                       | rs28416813       | IFNL3   | 5 prime UTR variant                    | 0.88   | 0.86   | 0.94   | <0.8   |
|           |             |                       |                                       | rs12979860       | IFNL3   | upstream gene variant                  | 0.94   | 0.87   | 0.93   | <0.8   |
|           |             |                       |                                       | rs8109886        | IFNL4   | upstream gene variant                  | <0.8   | 0.89   | <0.8   | <0.8   |
|           |             |                       |                                       | rs8113007        | IFNL4   | upstream gene variant                  | 0.88   | 0.97   | 0.84   | <0.8   |
|           |             |                       |                                       | rs8099917        | IFNL4   | upstream gene variant                  | <0.8   | 0.94   | <0.8   | <0.8   |
| rs7248668 | IFNL4       | upstream gene variant | <0.8                                  | 0.94             | <0.8    | <0.8                                   |        |        |        |        |
| 21        | rs881712    | CBR3                  | structural interaction variant        | rs8133052        | CBR3    | missense variant                       | 0.94   | 1.00   | 0.83   | <0.8   |
| 22        | rs3761      | ADORA2A-              | splice donor variant &                | rs5996696        | ADORA2A | upstream gene variant                  | <0.8   | 0.90   | <0.8   | <0.8   |

|  |     |     |                |  |  |  |  |  |  |  |
|--|-----|-----|----------------|--|--|--|--|--|--|--|
|  | 423 | AS1 | intron variant |  |  |  |  |  |  |  |
|--|-----|-----|----------------|--|--|--|--|--|--|--|

**Abbreviations:** Chr = Chromosome, EUR r2 = linkage disequilibrium in the European Population of 1000 Genomes project measured in r-squared; EAS r2 = linkage disequilibrium in the Eastern Asian Population of 1000 Genomes project measured in r-squared; AMR r2= linkage disequilibrium in the American Population of 1000 Genomes project measured in r-squared; AFR r2 = linkage disequilibrium in the African Population of 1000 Genomes project measured in r-squared. **Annotation definitions:** structural interaction variant = These are "within protein" interaction loci, which are likely to be supporting the protein structure. They are calculated from single protein PDB entries, by selecting amino acids that are: a) atom within 3 Angstrom of each other; and b) are far away in the AA sequence (over 20 AA distance). The assumption is that, since they are very close in distance, they must be "interacting" and thus important for protein structure. For more information, see [http://snpeff.sourceforge.net/SnpEff\\_manual.html](http://snpeff.sourceforge.net/SnpEff_manual.html).

**Table 2 - Variants predicted with moderate impact identified in this study, which are in LD with known pharmacogenomics variants**

| Chr | New Variant    | Gene     | Functional annotation           | PharmGKBVariant | Gene         | Annotation              | EUR r2 | EAS r2 | AMR r2 | AFR r2 |
|-----|----------------|----------|---------------------------------|-----------------|--------------|-------------------------|--------|--------|--------|--------|
| 18  | rs2853533<br>★ | C18orf56 | missense variant & TFBS variant | rs2853741       | RP11-806L2.5 | upstream gene variant   | <0.8   | 0.85   | <0.8   | <0.8   |
| 1   | rs55867221     | C1orf167 | missense variant & TFBS variant | rs17367504      | CLCN6        | upstream gene variant   | <0.8   | 0.9    | <0.8   | <0.8   |
|     |                |          |                                 | rs3737967       | C1orf167     | missense variant        | <0.8   | 0.98   | 0.87   | <0.8   |
|     |                |          |                                 | rs2274976       | MTHFR        | missense variant        | <0.8   | 0.96   | 0.87   | <0.8   |
| 1   | rs1537514      | C1orf167 | missense variant                | rs3737967       | C1orf167     | missense variant        | <0.8   | 0.98   | 0.87   | <0.8   |
|     |                |          |                                 | rs2274976       | MTHFR        | missense variant        | <0.8   | 0.96   | 0.87   | <0.8   |
|     |                |          |                                 | rs17367504      | CLCN6        | upstream gene variant   | <0.8   | 0.9    | <0.8   | <0.8   |
| 1   | rs1800595      | F5       | missense variant                | rs6018          | F5           | missense variant        | 1      | 1      | 1      | 1      |
| 1   | rs6027         | F5       | missense variant                | rs6018          | F5           | missense variant        | 0.94   | 0.89   | 0.97   | <0.8   |
| 1   | rs6033         | F5       | missense variant                | rs6018          | F5           | missense variant        | <0.8   | 0.83   | <0.8   | <0.8   |
| 3   | rs3732765      | MED12L   | missense variant                | rs9859538       | MED12L       | intron variant          | <0.8   | 0.97   | <0.8   | <0.8   |
|     |                |          |                                 | rs10935842      | P2RY12       | upstream gene variant   | 1      | 0.99   | 0.97   | <0.8   |
|     |                |          |                                 | rs6798637       | P2RY12       | upstream gene variant   | 0.89   | <0.8   | <0.8   | <0.8   |
| 4   | rs1693482      | ADH1C    | missense variant                | rs1662060       | ADH1C        | downstream gene variant | 1      | 1      | 0.96   | 1      |
|     |                |          |                                 | rs698           | ADH1C        | missense variant        | 1      | 1      | 0.96   | 1      |
| 4   | rs4963         | ADD1     | missense variant                | rs4961          | ADD1         | missense variant        | 0.88   | 0.99   | 0.96   | <0.8   |
| 7   | rs2307040      | CALU     | missense variant                | rs1043550       | CALU         | 3 prime UTR variant     | 0.82   | <0.8   | 0.96   | 0.89   |
|     |                |          |                                 | rs11653         | CALU         | 3 prime UTR variant     | 0.82   | <0.8   | 0.96   | 0.89   |



|    |             |         |                  |            |         |                         |      |      |      |      |
|----|-------------|---------|------------------|------------|---------|-------------------------|------|------|------|------|
| 9  | rs56350726  | SLC28A3 | missense variant | rs10868138 | SLC28A3 | missense variant        | 0.81 | <0.8 | 0.83 | <0.8 |
| 11 | rs11604671  | ANKK1   | missense variant | rs2734849  | ANKK1   | missense variant        | 0.97 | 1    | 0.98 | <0.8 |
|    |             |         |                  | rs6277     | DRD2    | synonymous variant      | <0.8 | 1    | 0.88 | <0.8 |
|    |             |         |                  | rs2587548  | DRD2    | upstream gene variant   | <0.8 | 1    | <0.8 | <0.8 |
|    |             |         |                  | rs2734833  | DRD2    | upstream gene variant   | <0.8 | 1    | <0.8 | <0.8 |
|    |             |         |                  | rs1076563  | DRD2    | upstream gene variant   | <0.8 | 0.97 | <0.8 | <0.8 |
| 16 | rs115629050 | CES1    | missense variant | rs2307240  | CES1    | missense variant        | <0.8 | <0.8 | 0.9  | <0.8 |
| 16 | rs2307227   | CES1    | missense variant | rs2307240  | CES1    | missense variant        | <0.8 | <0.8 | 0.9  | <0.8 |
| 16 | rs79711700  | CES1    | missense variant | rs2307240  | CES1    | missense variant        | 0.88 | <0.8 | 1    | <0.8 |
| 19 | rs2336219   | CD3EAP  | missense variant | rs967591   | CD3EAP  | 5 prime UTR variant     | 0.83 | 1    | 0.96 | <0.8 |
|    |             |         |                  | rs735482   | CD3EAP  | missense variant        | 1    | 1    | 0.96 | 0.93 |
| 19 | rs12971396  | IFNL4   | missense variant | rs12980275 | IFNL3P1 | upstream gene variant   | <0.8 | 0.84 | <0.8 | <0.8 |
|    |             |         |                  | rs8105790  | IFNL3P1 | upstream gene variant   | 0.92 | 0.97 | 0.97 | <0.8 |
|    |             |         |                  | rs4803217  | IFNL3   | downstream gene variant | <0.8 | 0.94 | <0.8 | <0.8 |
|    |             |         |                  | rs11881222 | IFNL4   | downstream gene variant | <0.8 | 0.91 | <0.8 | <0.8 |
|    |             |         |                  | rs28416813 | IFNL3   | 5 prime UTR variant     | <0.8 | 0.83 | <0.8 | <0.8 |
|    |             |         |                  | rs12979860 | IFNL3   | upstream gene variant   | <0.8 | 0.84 | <0.8 | <0.8 |
|    |             |         |                  | rs8109886  | IFNL4   | upstream gene variant   | <0.8 | 0.86 | <0.8 | <0.8 |

|    |           |        |                  |            |         |                         |      |      |      |      |
|----|-----------|--------|------------------|------------|---------|-------------------------|------|------|------|------|
|    |           |        |                  | rs8113007  | IFNL4   | upstream gene variant   | <0.8 | 0.94 | <0.8 | <0.8 |
|    |           |        |                  | rs8099917  | IFNL4   | upstream gene variant   | 0.93 | 0.97 | 0.86 | <0.8 |
|    |           |        |                  | rs7248668  | IFNL4   | upstream gene variant   | 0.93 | 0.97 | 0.86 | <0.8 |
| 19 | rs4803221 | IFNL4  | missense variant | rs12980275 | IFNL3P1 | upstream gene variant   | <0.8 | 0.84 | <0.8 | <0.8 |
|    |           |        |                  | rs8105790  | IFNL3P1 | upstream gene variant   | 0.93 | 0.97 | 0.95 | 0.81 |
|    |           |        |                  | rs4803217  | IFNL3   | downstream gene variant | <0.8 | 0.94 | <0.8 | <0.8 |
|    |           |        |                  | rs11881222 | IFNL4   | downstream gene variant | <0.8 | 0.91 | <0.8 | <0.8 |
|    |           |        |                  | rs28416813 | IFNL3   | 5 prime UTR variant     | <0.8 | 0.83 | <0.8 | <0.8 |
|    |           |        |                  | rs12979860 | IFNL3   | upstream gene variant   | <0.8 | 0.84 | <0.8 | <0.8 |
|    |           |        |                  | rs8109886  | IFNL4   | upstream gene variant   | <0.8 | 0.86 | <0.8 | <0.8 |
|    |           |        |                  | rs8113007  | IFNL4   | upstream gene variant   | <0.8 | 0.94 | <0.8 | <0.8 |
|    |           |        |                  | rs8099917  | IFNL4   | upstream gene variant   | 0.95 | 0.97 | 0.89 | <0.8 |
|    |           |        |                  | rs7248668  | IFNL4   | upstream gene variant   | 0.95 | 0.97 | 0.89 | <0.8 |
| 19 | rs762562  | CD3EAP | missense variant | rs967591   | CD3EAP  | 5 prime UTR variant     | 0.83 | 1    | 0.92 | <0.8 |
|    |           |        |                  | rs735482   | CD3EAP  | missense variant        | 1    | 1    | 1    | 1    |

**rs2853533★** - phenotype association (SNPedia): Neural Tube Defects & Spina Bifida Cystica (The G variant of rs2853533 was associated with Spina Bifida in a transmission disequilibrium test. Study size: 610 families (329 trios, 281 duos) Study population/ethnicity: Patients affected with Spina Bifida and their parents;

Houston, TX; Los Angeles, CA; Toronto, ON, Canada Significance metric(s):  $p=0.0213$ ). **Abbreviations:** Chr = Chromosome, EUR  $r^2$  = linkage disequilibrium in the European Population of 1000 Genomes project measured in r-squared; EAS  $r^2$  = linkage disequilibrium in the Eastern Asian Population of 1000 Genomes project measured in r-squared; AMR  $r^2$  = linkage disequilibrium in the American Population of 1000 Genomes project measured in r-squared; AFR  $r^2$  = linkage disequilibrium in the African Population of 1000 Genomes project measured in r-squared.
